# Supplementary material for: The Death of a Child and Parents’ Psychological Distress in Mid to Later Life: Racial/Ethnic Differences in Exposure and Vulnerability
Source: Oxford University Press journal article supplement (doi:10.1093/geronb/gbab206), 2021-10-30
Supplement: gbab206_suppl_supplemental_material.docx [file gbab206_suppl_supplemental_material.docx]

| **Supplement A.** *Multilevel Models Regressing Psychological Death on Child Death, Including the Interaction of Parent Age with Child Death (HRS, 2006-2016)* | | |
| --- | --- | --- |
|  | Model 1 | Model 2 |
| Experienced Child Death | 0.28*** | 0.18*** |
|  | (0.04) | (0.04) |
| Age (centered at 65) | -0.01*** | -0.00* |
|  | (0.00) | (0.00) |
| Age Squared | 0.00*** | 0.00*** |
|  | (0.00) | (0.00) |
| Child Died*Parent Age | -0.01* | -0.01* |
|  | (0.00) | (0.00) |
| Duration Since Child Death (in years) | -0.00 | -0.00* |
|  | (0.00) | (0.00) |
| Non-Hispanic Black (ref: Non-Hispanic White) | -0.01* | -0.01* |
|  | (0.00) | (0.00) |
| U.S.-born Hispanic (ref: Non-Hispanic White) | -0.00 | -0.00* |
|  | (0.00) | (0.00) |
| Foreign-born Hispanic (ref: Non-Hispanic White) | 0.23*** | 0.19*** |
|  | (0.04) | (0.03) |
| Female | 0.45*** | 0.35*** |
|  | (0.10) | (0.08) |
| Born in the South | 0.39*** | 0.31*** |
|  | (0.08) | (0.07) |
| High School (ref: Less than high school) | 0.30*** | 0.23*** |
|  | (0.03) | (0.02) |
| Some College (ref: Less than high school) | 0.14*** | 0.12*** |
|  | (0.03) | (0.02) |
| College+ (ref: Less than high school) | -0.54*** | -0.38*** |
|  | (0.05) | (0.05) |
| Number of Children | -0.76*** | -0.57*** |
|  | (0.05) | (0.05) |
| Total Family Deaths Before Baseline |  | 0.03* |
|  |  | (0.01) |
| Personal Control at Baseline |  | -0.40*** |
|  |  | (0.01) |
| Chronic Stress at Baseline |  | 0.12*** |
|  |  | (0.00) |
| Intercept Variance | 1.97*** | 1.41*** |
|  | (0.04) | (0.03) |
| Residual Variance | 1.71*** | 1.71*** |
|  | (0.03) | (0.03) |
| Constant | 1.56*** | 1.92*** |
|  | (0.06) | (0.11) |

*Note.* Standard errors in parentheses; *** p<0.001, ** p<0.01, * p<0.05, + p<0.10
